# Supplementary material for: β-Ketoadipic acid production from poly(ethylene terephthalate) waste via chemobiological upcycling
Source: Royal Society of Chemistry journal article supplement (doi:10.1039/d3ra02072j), 2023-01-01
Supplement: d3ra02072j1.pdf [file d3ra02072j1.pdf]

1                   **Electronic Supplementary Information (ESI)**

2  
3                    **$\beta$ -Keto adipic Acid Production from Poly(ethylene**  
4 **terephthalate) Waste via Chemobiological Upcycling**

5  
6                   Sang-Mook You<sup>a</sup>, Si Seon Lee<sup>b</sup>, Mi Hee Ryu<sup>c</sup>, Hye Min Song<sup>d</sup>, Min Soo Kang<sup>a</sup>, Ye Jean  
7 Jung<sup>a</sup>, Eun Chae Song<sup>e</sup>, Bong Hyun Sung<sup>f</sup>, Si Jae Park<sup>d</sup>, Jeong Chan Joo<sup>b,\*</sup>, Hee Taek Kim<sup>e,\*</sup>  
8                   and Hyun Gil Cha<sup>a,\*</sup>

9  
10 a Center for Bio-based Chemistry, Korea Research Institute of Chemical Technology (KRICT), Ulsan  
11 44429, Republic of Korea

12 b Department of Biotechnology, The Catholic University of Korea, Bucheon-si, Gyeonggi-do 14662,  
13 Republic of Korea

14 c Green Carbon Research Center Korea Research Institute of Chemical Technology (KRICT), Daejeon  
15 34114, Republic of Korea

16 d Department of Chemical Engineering and Materials Science, Graduate Program in System Health Science  
17 & Engineering, Ewha Woman's University, Seoul 03760, Republic of Korea

18 e Department of Food Science and Technology, College of Agriculture and Life Sciences, Chungnam  
19 National University, Daejeon 34134, Republic of Korea

20 f Synthetic Biology Research Center, Korea Research Institute of Bioscience and Biotechnology, Daejeon  
21 34141, Republic of Korea

22  
23 \*Corresponding author

24 Jeong Chan Joo: [jcjoo@catholic.ac.kr](mailto:jcjoo@catholic.ac.kr)

25  
26 Hee Taek Kim: [heetaek@cnu.ac.kr](mailto:heetaek@cnu.ac.kr)

27  
28 Hyun Gil Cha: [hgcha@kRICT.re.kr](mailto:hgcha@kRICT.re.kr)

29  
30  
31 **Keywords:** Poly(ethylene terephthalate), chemical hydrolysis, two-stage fed-batch  
32 bioconversion, amberlyst-15, beta-keto adipate

33

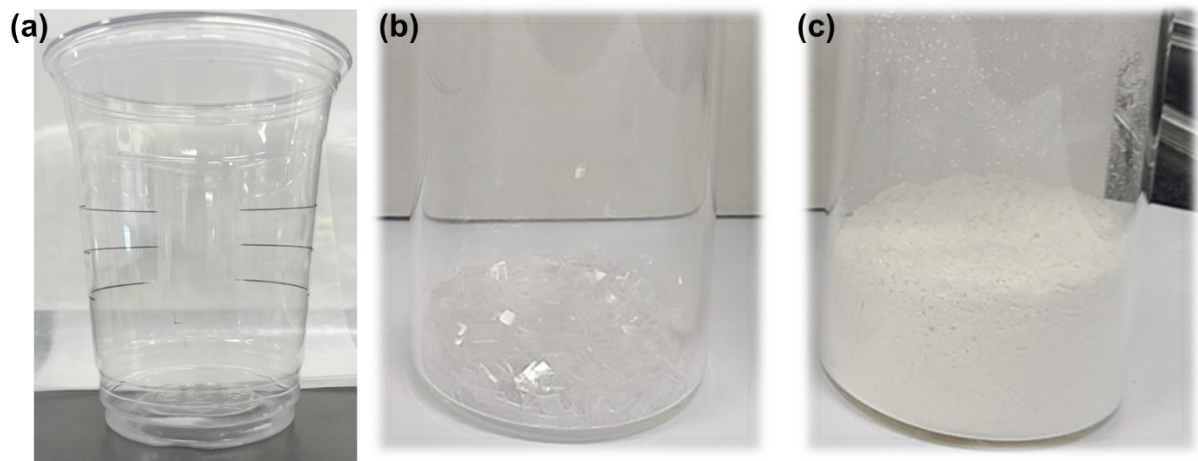

34

35 **Fig. S1** Image of (a) disposable plastic waste cup, (b-c) followed by the same cup in pieces  
36 after being cut and grounded

37

38

39

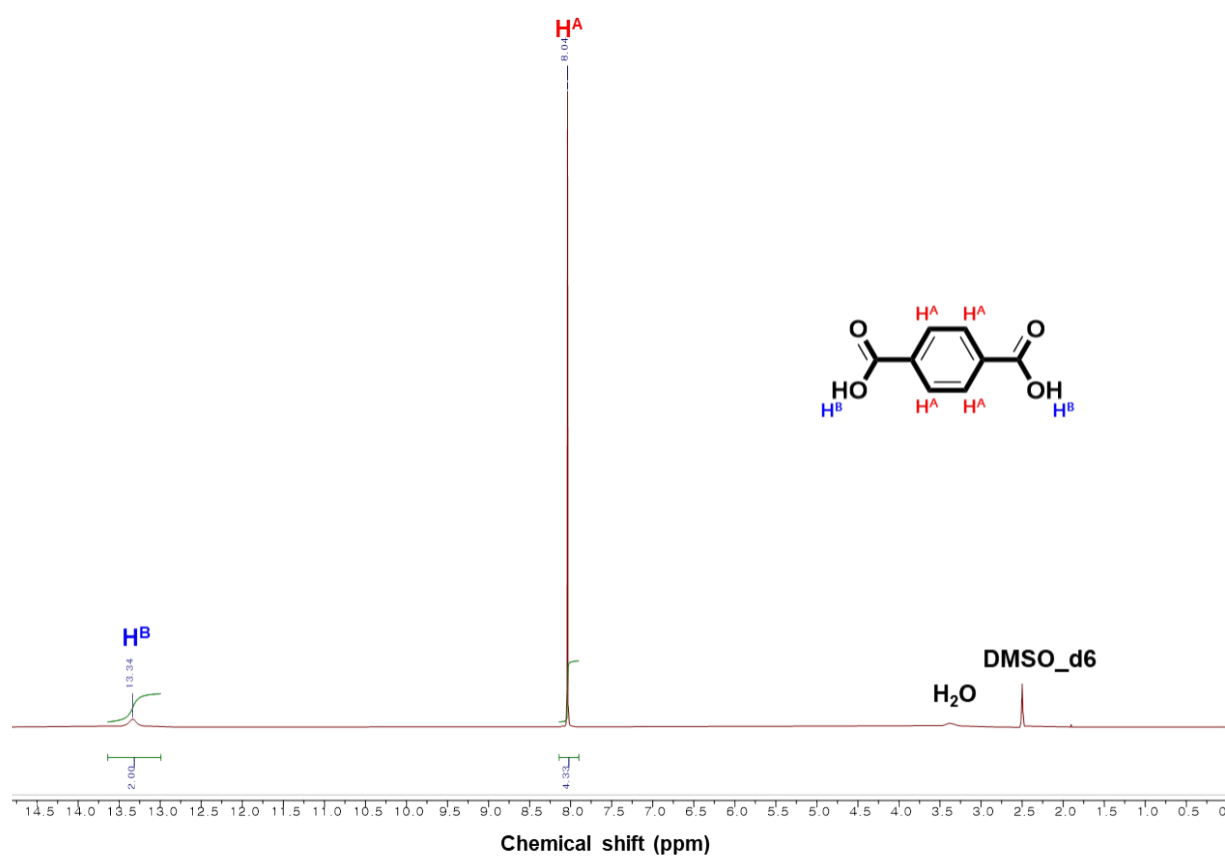

40

41 **Fig. S2**  $^1H$  NMR of terephthalic acid (TPA) from Amberlyst-15-mediated PET hydrolysis

42
